# Supplementary material
Source: Springer Nature journal article supplement (https://www.springermedizin.de/resource/supplementary/13014_2013_1061_MOESM1_ESM.pdf/9635234)
Supplement: MOESM1 [file 9635234]

**Opposing-field  
technique  
(n=29)**

**3D-conformal  
technique  
(n=17)**

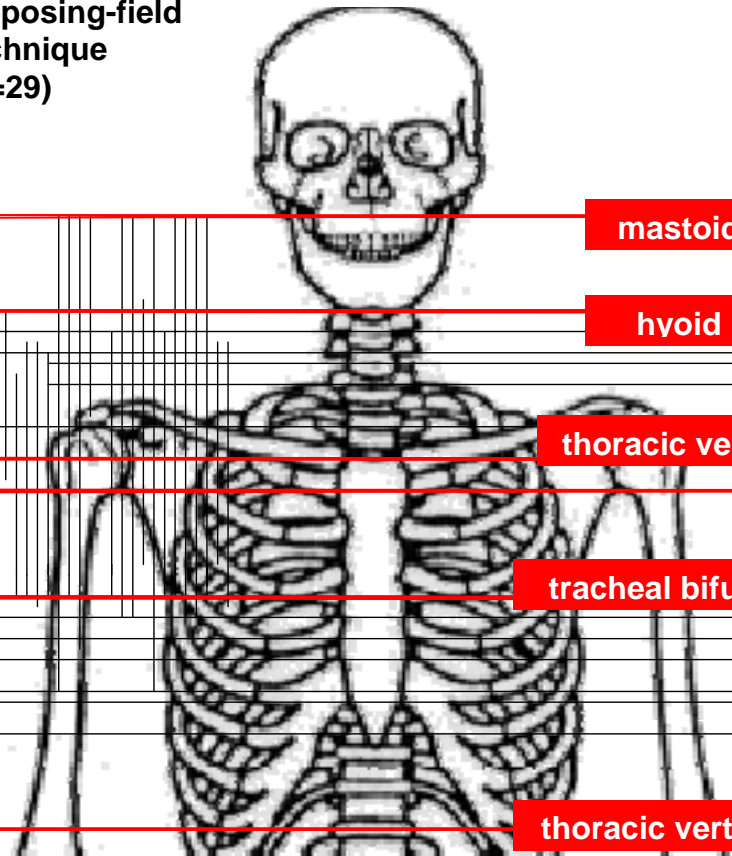

**mastoid**

**hyoid**

**thoracic vertebra 1**

**tracheal bifurcation**

**thoracic vertebra 11**
